# Supplementary material
Source: PubMed Central journal article supplement (PMC6414225)
Supplement: NIHMS1012967-supplement-2.pdf [file NIHMS1012967-supplement-2.pdf]

**Appendix from L. Merrill and J. L. Grindstaff, “Early Life Stress Strengthens Trait Covariance: A Plastic Response That Results in Reduced Flexibility”**

**(Am. Nat., vol. 192, no. 5, p. 593)**

**Graphical Presentation of Data Grouped by Treatment and Mortality Categories**

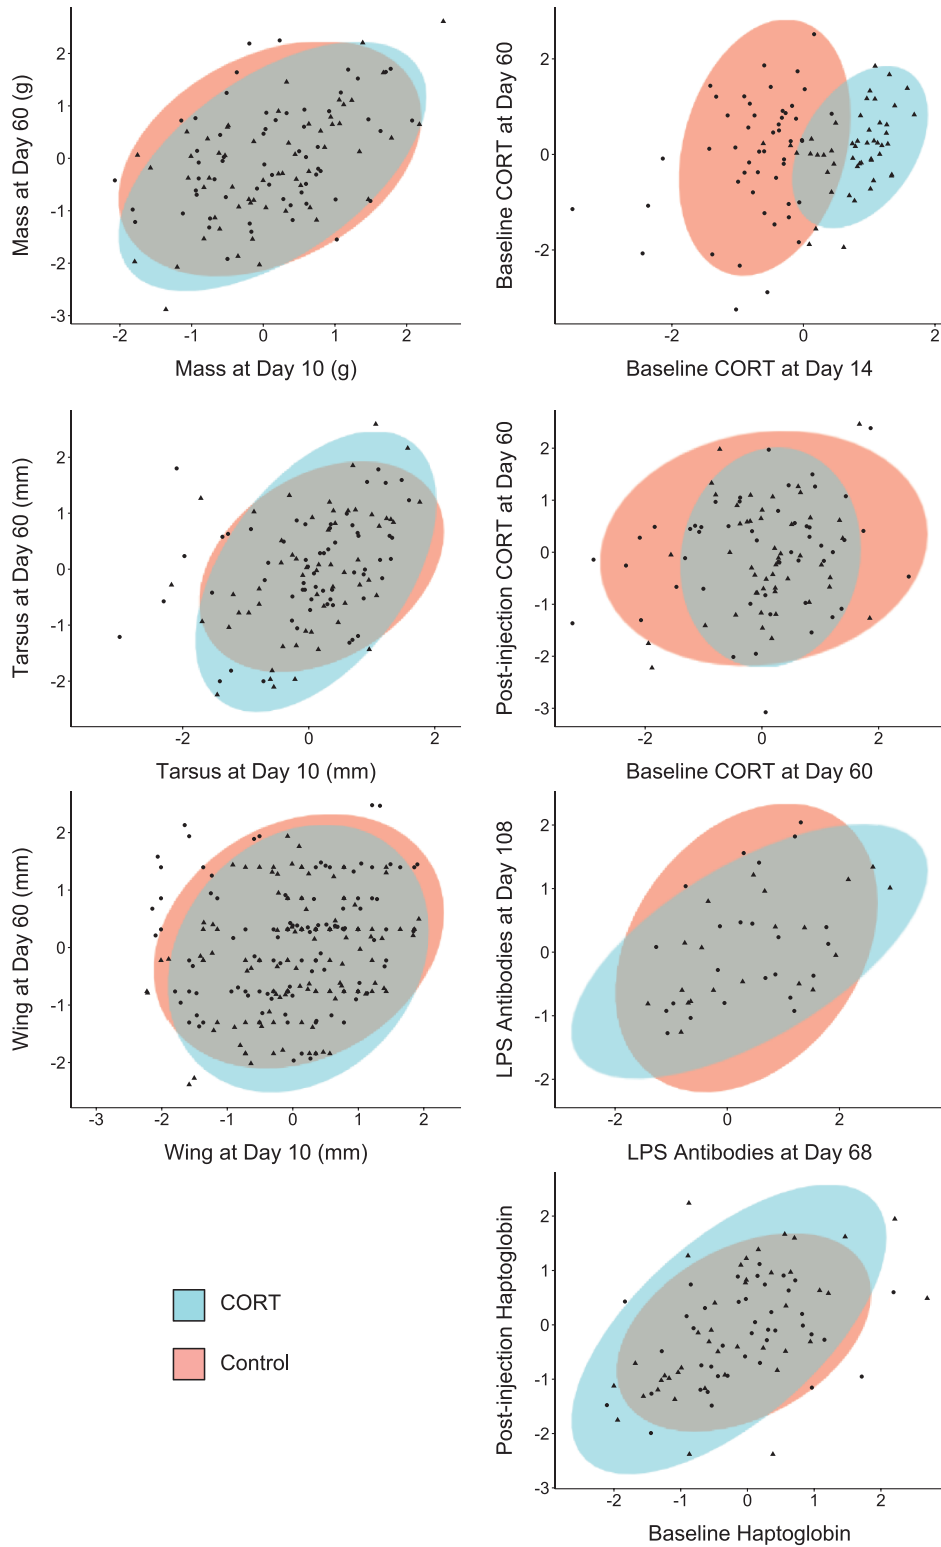

**Figure A1:** Graphical presentation of 95% confidence ellipses of within-trait correlations by developmental treatment. Blue ellipses reflect birds treated by corticosterone (CORT; denoted by triangles), and peach ellipses are control birds (denoted by circles). LPS = lipopolysaccharide.

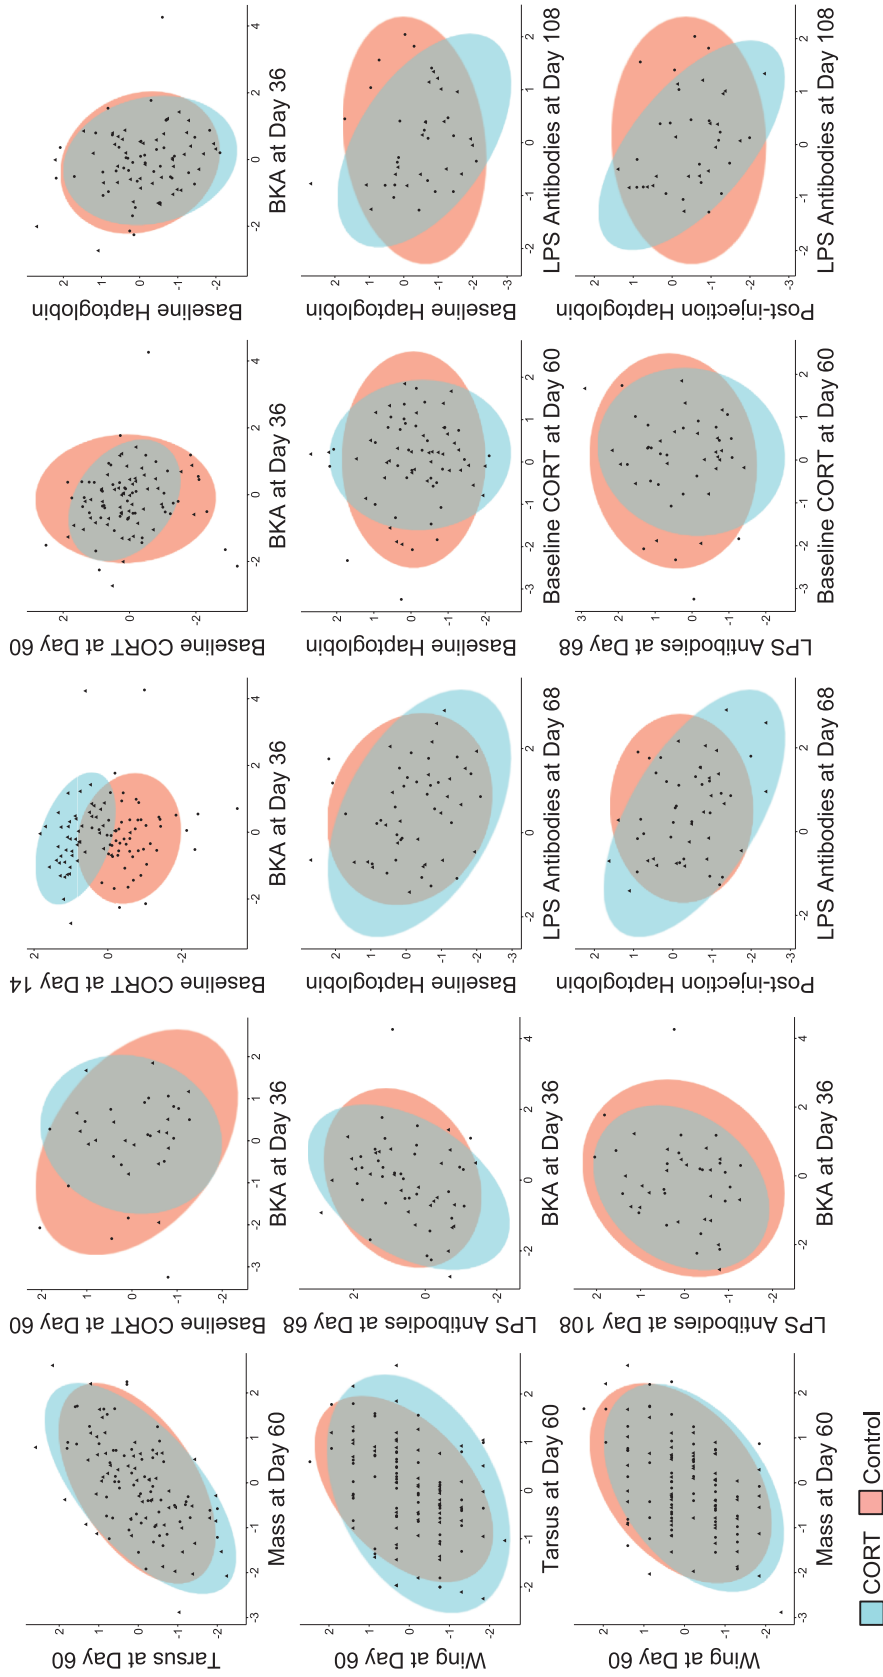

**Figure A2:** Graphical presentation of 95% confidence ellipses of among-trait correlations by developmental treatment. Blue ellipses reflect birds treated with corticosterone (CORT; denoted by triangles), and peach ellipses are control birds (denoted by circles). BKA = bacterial killing ability; LPS = lipopolysaccharide.

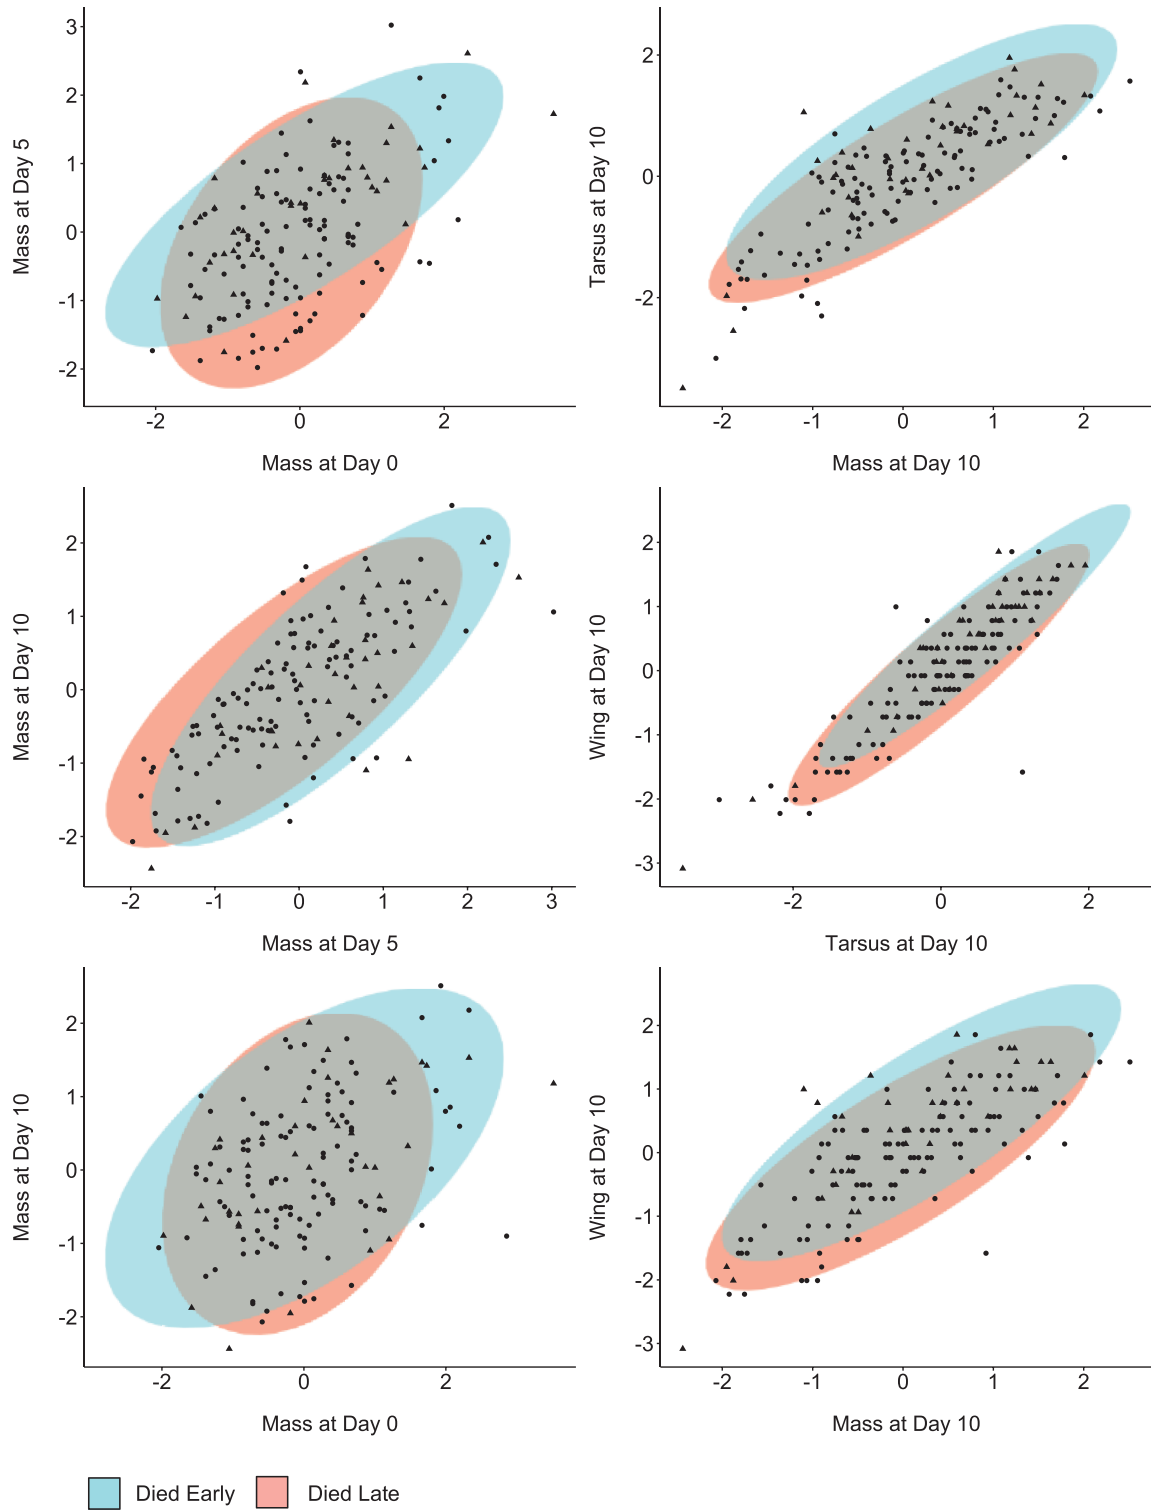

**Figure A3:** Graphical presentation of 95% confidence ellipses of within- and among-trait associations by mortality. Blue ellipses are birds that died prior to the median age of death (denoted by triangles), and peach ellipses are birds that survived to at least the median age of death (denoted by circles).

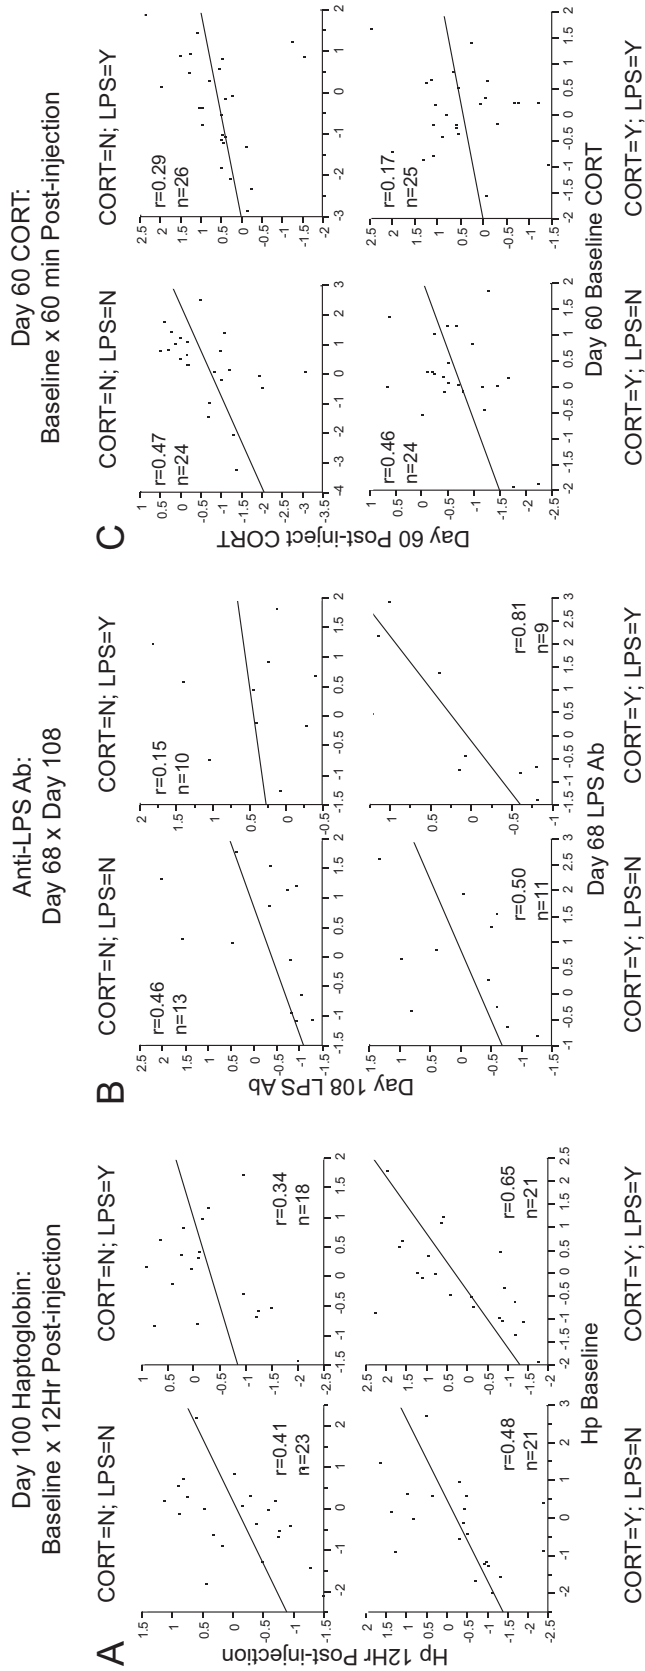

**Figure A4:** Within-trait correlations for three physiology measures in which at least one measure was taken after lipopolysaccharide (LPS) challenge, divided by corticosterone (CORT) and LPS treatments. *A*, Associations between baseline haptoglobin (Hp) and Hp 12 h post-LPS challenge (12 h postinjection). *B*, Associations between anti-LPS antibodies (Ab) levels on days 68 and 108 posthatch. *C*, CORT immediately prior to LPS challenge (baseline CORT) and CORT 60 min after LPS challenge (60 min postinjection). “Y” signifies birds that received the indicated treatment, and “N” signifies birds that did not receive the treatment.

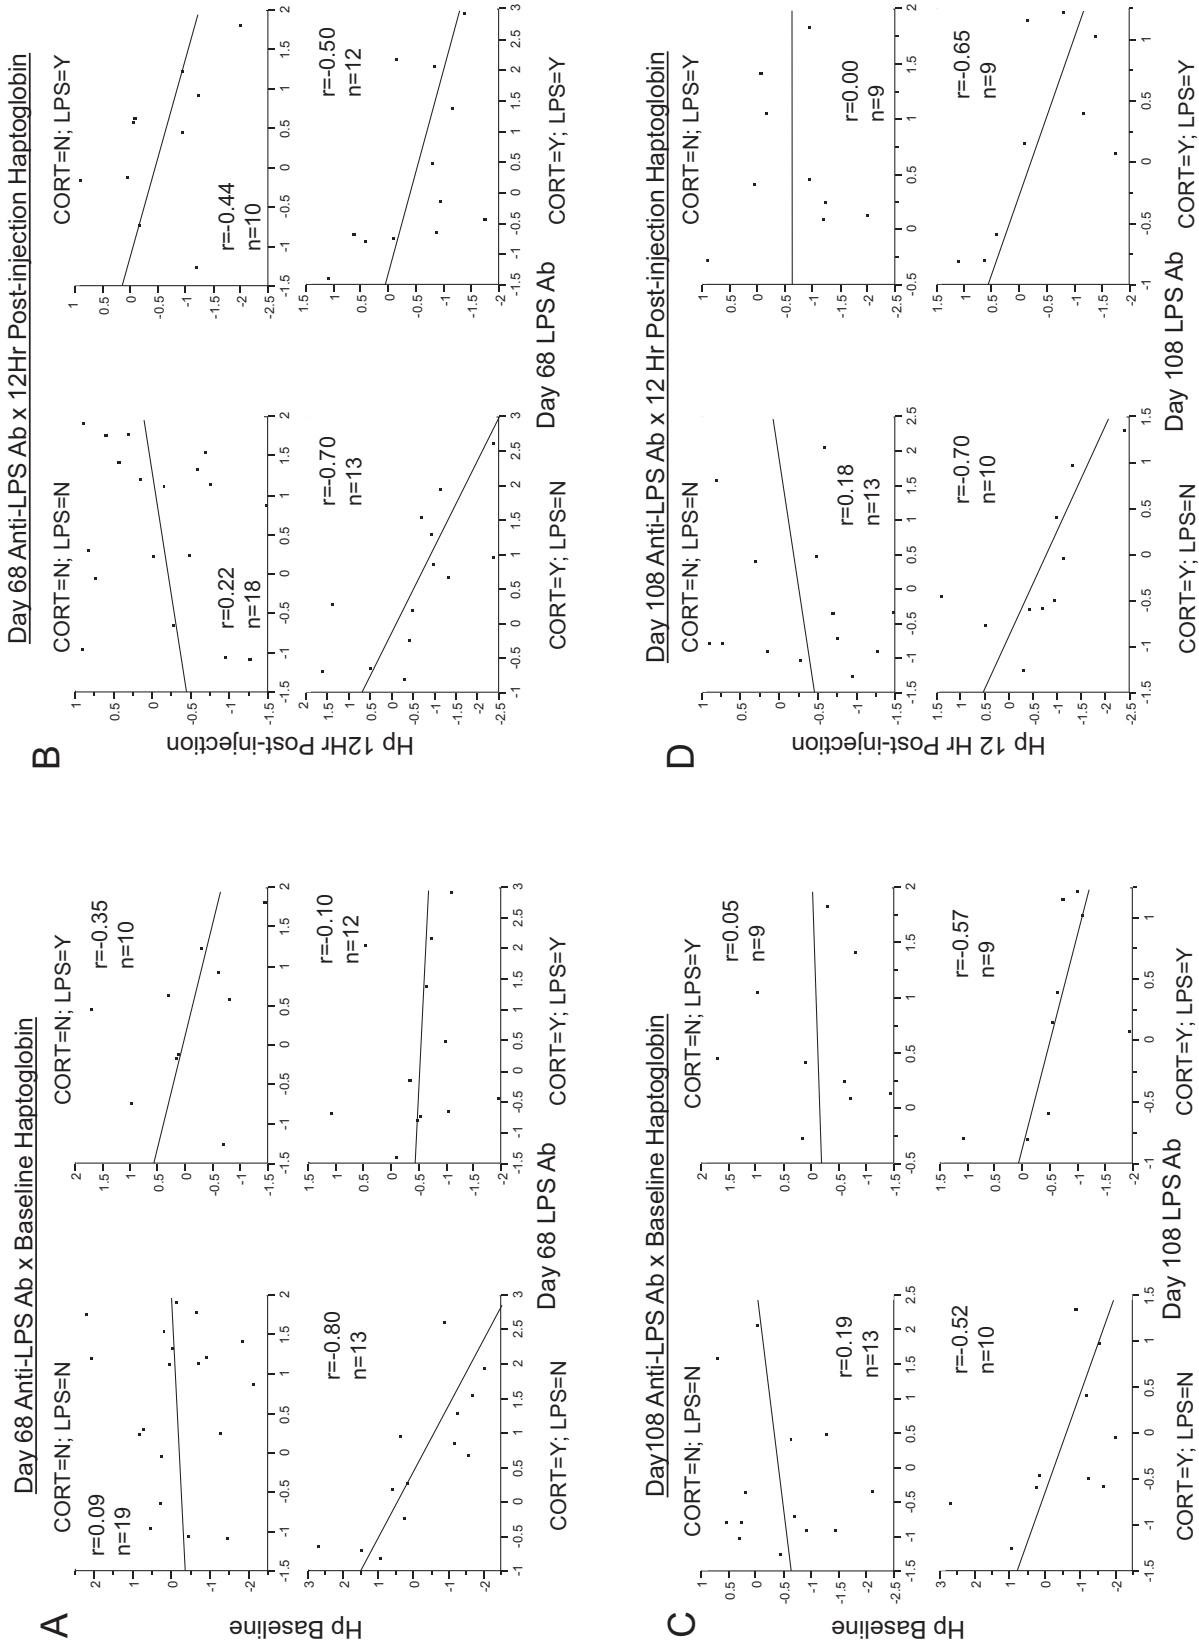

**Figure A5:** Among-trait correlations for four physiology measures in which at least one measure was taken after lipopolysaccharide (LPS) challenge, divided by corticosterone (CORT) and LPS treatments. *A*, Associations between day 68 anti-LPS antibody (Ab) levels and baseline haptoglobin (Hp). *B*, Associations between day 68 anti-LPS Ab levels and Hp levels 12 h after LPS challenge on day 100 (Hp 12 h postinjection). *C*, Associations between day 108 anti-LPS Ab and baseline Hp. *D*, Associations between day 108 anti-LPS Ab and Hp levels 12 h after LPS challenge on day 100. “Y” signifies birds that received the indicated treatment, and “N” signifies birds that did not receive the treatment.
